# Supplementary material for: Resolving colistin resistance and heteroresistance in Enterobacter species
Source: Nat Commun. 2023 Jan 10;14:140. doi: 10.1038/s41467-022-35717-0 (PMC9832134; doi:10.1038/s41467-022-35717-0)
Supplement: Supplementary file 5 — Supplementary Data 3 [file 41467_2022_35717_MOESM5_ESM.xlsx]

## Sheet: Sheet1
genes	primer sequence
primer used to amplify the kanamycin gene flanked by FRT-sites (FLP recognition target) for target deletion
arn_F	5'-ATATCAAAAAGTTGCCATGCATAACTCAAGGAAATTAATAGTGTAGGCTGGAGCTGCTTC-3'
arn_R	5'-GTCTGTACCCCTACGCCTTTCACCTTAACGGCGGAAGCGGCATATGAATATCCTCCTTAG-3'
mgrB_F	5-CGCCGCGTAAGGACATCACTCAGCGTAAAAATGGTCTCTAGTGTAGGCTGGAGCTGCTTC-3
mgrB_R	5-TGATAACCTGGCTGTATCAGGTCATAAGACGGAGTGTGGACATATGAATATCCTCCTTAG-3
phoPQ_F	5’-CAGCGTTAAACTATTCATACCATTTATAAAGGGAGAAGTGGTGTAGGCTGGAGCTGCTTC-3’
phoPQ_R	5’-CCCCCTGACTGCGAGATCCGCGTATTTTTCACATTTCGGGCATATGAATATCCTCCTTAG-3’
pmrAB_F	5’-AAAGCAGGCTCTATAAGGACATCTACCAGAATAACTAGCGGTGTAGGCTGGAGCTGCTTC-3’
pmrAB_R	5’-GCACTAACCCCTGTATAAAGCCCCTTAACGGGGCTTTTTTCATATGAATATCCTCCTTAG-3’
Control primers to check the integration of kanamycin gene in the chromosome and to confirm the replacement of target gene cassette
Cnt_arn_F	5'-AGTTGCCATGCATAACTCAAG-3'
Cnt_arn_R	5'-CCTACGCCTTTCACCTTAAC-3'
Cnt_OprD_F	5’-TAACTTAAAAGCACGTATCG-3’
Cnt_OprD_R	5’-GGCAGATTGGCGCCCTGAAGT-3’
Cnt_phoPQ_F	5’-GTCAACATACTTAATAATCAG-3’
Cnt_phoPQ_R	5’-GTTAAGCGTTAATTGATAAT-3’
Cnt_pmrAB_F	5’-GGCTGACCAGCGCAATCGCCGT-3’
Cnt_pmrAB_R	5’-GATGACTGGGATGAAGACGA-3’
Cnt_eptA_F	5-GCCGGTAGCCAGCAAATGTT-3
Cnt_eptA_R	5-GCGTGCGCATGCAGCCACGA-3
Cnt_dedA_F	5-ATTTTTGCCTCCAACAGACC-3
Cnt_dedA_R	5-ATTATCCGGACCGGTTCGAC-3
Cnt_tolC_F	5-TTTTGGTGTGGATGATTCTG-3
Cnt_tolC_R	5-TCAGGTGTGATTTTGCGCCG-3
Cnt_mgrB_F	5-TAACTCACCCATTTCACCAC-3
Cnt_mgrB_R	5-GCGTCTGTTGAAGGTACAGT-3
Primers used for the complementation of genes in pBBR1-MCS2
compl_arn_F	5'-GCGCACTAGTACCATCTTAATTTTTCCCTA-3'
compl_arn_R	5'-GCGCGAATTCTTACTTACTCCGGTATTTCT-3'
compl_phoPQ_F	5'-GCGCACTAGTGGTCAACATACTTAATAATC-3'
compl_phoPQ_R	5'-GCGCGAATTCTCAACTATCGTTCGATACGG-3'
compl_mgrB_F	5'-GCGCACTAGTATAGAGTAAGCGTAACGGCT-3'
compl_mgrB_R	5'-GCGCGAATTCCTACCAGGGGATAAACTTAT-3'
phoPQ246_F	5'-GCGCACTAGTTTTTCCCCGGTTTACTGAAT-3'
phoPQ246_R	5'-GCGCGAATTCTTAACTATCGTCCGATGTGG-3'
phoPQ516_F	5'-GCGCACTAGTTTCCCCGGTTTACTCAATGT-3'
phoPQ516_R	5'-GCGCGAATTCCTGCGAGATCCTCGCATT-3'
Primers used to generate phoP/phoQ hybrid construct complementing in pBBR1-MCS2
phoQ394phoP246	pBBR1_Q394_1	5'-ATAAGCTTGATATCGAATTCTCAACTATCGTTCGATACGG-3'
	pBBR1_Q394_2	5'-CCGTATCGAACGATAGTTGAGAATTCGATATCAAGCTTAT-3'
	Q394_P246_1	5'-TGGCGCAATATCCCTTTCATTTAGCGTAATTCGAACAGG-3'
	Q394_P246_2	5'-ACCTGTTCGAATTACGCTAAATGAAAGGGATATTGCGC-3'
	P246_pBBR1_1	5'-ATTCAGTAAACCGGGGAAAAACTAGTTCTAGAGCGGCCGC-3'
	P246_pBBR1_2	5'-GCGGCCGCTCTAGAACTAGTTTTTCCCCGGTTTACTGAAT-3'
phoQ246phoP394	pBBR1_Q246_1	5'-ATAAGCTTGATATCGAATTCTTAACTATCGTCCGATGTGG-3'
	pBBR1_Q246_2	5'-CCACATCGGACGATAGTTAAGAATTCGATATCAAGCTTAT-3'
	Q246_P394_1	5'-ACCTGTTCGAATTACGCTAAATGAGACGGATTTTGCGC-3'
	Q246_P394_2	5'-TGGCGCAAAATCCGTCTCATTTAGCGTAATTCGAACAG-3'
	p394_pBBR1_1	5'-GATTATTAAGTATGTTGACCACTAGTTCTAGAGCGGCCGC-3'
	p394_pBBR1_2	5'-GCGGCCGCTCTAGAACTAGTGGTCAACATACTTAATAATC-3'
phoQ394phoP516	pBBR1_Q394_1	5'-ATAAGCTTGATATCGAATTCTCAACTATCGTTCGATACGG-3'
	pBBR1_Q394_2	5'-CCGTATCGAACGATAGTTGAGAATTCGATATCAAGCTTAT-3'
	Q394_P516_1	5'-TGGCGCAATATCCCTTTCATTTAGCGTAATTCAAACAGGT-3'
	Q394_P516_2	5'-ACCTGTTTGAATTACGCTAAATGAAAGGGATATTGCGCCA-3'
	P516_pBBR1_1	5'-ACATTGAGTAAACCGGGGAAACTAGTTCTAGAGCGGCCGC-3'
	P516_pBBR1_2	5'-GCGGCCGCTCTAGAACTAGTTTCCCCGGTTTACTCAATGT-3'
phoQ516phoP394	pBBR1_Q516_1	5'-ATAAGCTTGATATCGAATTCTTAACTATCGTTCGATGTCG-3'
	pBBR1_Q516_2	5'-CGACATCGAACGATAGTTAAGAATTCGATATCAAGCTTAT-3'
	Q516_P394_1	5'-TGACGCAAAATCCGTCTCATTTAGCGTAATTCGAACAGGT-3'
	Q516_P394_2	5'-ACCTGTTCGAATTACGCTAAATGAGACGGATTTTGCGTCA-3'
	p394_pBBR1_1	5'-GATTATTAAGTATGTTGACCACTAGTTCTAGAGCGGCCGC-3'
	p394_pBBR1_2	5'-GCGGCCGCTCTAGAACTAGTGGTCAACATACTTAATAATC-3'
phoQ516phoP246	pBBR1_Q516_1	5'-ATAAGCTTGATATCGAATTCTTAACTATCGTTCGATGTCG-3'
	pBBR1_Q516_2	5'-CGACATCGAACGATAGTTAAGAATTCGATATCAAGCTTAT-3'
	Q516_P246_1	5'-TGACGCAAAATCCGTCTCATTTAGCGTAATTCGAACAGGT-3'
	Q516_P246_2	5'-ACCTGTTCGAATTACGCTAAATGAGACGGATTTTGCGTCA-3'
	p246_pBBR1_1	5'-ATTCAGTAAACCGGGGAAAAACTAGTTCTAGAGCGGCCGC-3'
	p246_pBBR1_2	5'-GCGGCCGCTCTAGAACTAGTTTTTCCCCGGTTTACTGAAT-3'
phoQ246phoP516	pBBR1_Q246_1	5'-ATAAGCTTGATATCGAATTCTTAACTATCGTCCGATGTGG-3'
	pBBR1_Q246_2	5'-CCACATCGGACGATAGTTAAGAATTCGATATCAAGCTTAT-3'
	Q246_P516_1	5'-TGGCGCAAAATCCGTCTCATTTAGCGTAATTCAAACAGGT-3'
	Q246_P516_2	5'-ACCTGTTTGAATTACGCTAAATGAGACGGATTTTGCGCCA-3'
	p516_pBBR1_1	5'-ACATTGAGTAAACCGGGGAAACTAGTTCTAGAGCGGCCGC-3'
	p516_pBBR1_2	5'-GCGGCCGCTCTAGAACTAGTTTCCCCGGTTTACTCAATGT-3'
Primers used for gene expression
arnA_F		5'-TCTTAATCCTCGGCGTGAAC-3'
arnA_R		5'-CTCGATCCATTCGGAATGGA-3'
PhoPQ_F		5'-GACCCCTTTACGCTGGTACA-3'
PhoPQ_R		5'-CGGTGATGCTGGAACAAATC-3'
pmrAB_F		5'-CGCTGTTAATGCCACTTCAA-3'
pmrAB_R		5'-ATTGCTCCGCTCAGCCTGGA-3'
mgrB_F		5'-TGAACAAATGCCGCTAAAGA-3'
mgrB_R		5'-TGGGTAATTCTGATTATAGT-3'
gyrA_F		5'-TTCCGGCAGCTGATAGACTT-3'
gyrA_R		5'-TACGTGAAGTATCAGCCGTT-3'
16SrRNA_F		5'-CTGTCGTCAGCTCGTGTTGT-3'
16SrRNA_R		5'-GCACGTGTGTAGCCCTACTC-3'
Strain/Plasmid	description		Source
RBK-17-0394-1	WT or used to create deletion mutant		this study
E. coli DH10β	Used for the propagation of newly constructed plasmid		our lab
pSIM5-tet	Encodes λ-Red system (γ, β and exo), used for deletion of target genes by allelic replacement		provided by Dr. Bork Berghoff, JLU Giessen
pCP20	To remove kanamycin gene from chromosome
pKD4	used to generate kanamycin cassette		our lab
pBBR1-MCS2	For complementation		Purchased from Addgene, https://www.addgene.org/85168/
