# Supplementary material for: Resolving colistin resistance and heteroresistance in Enterobacter species
Source: Nat Commun. 2023 Jan 10;14:140. doi: 10.1038/s41467-022-35717-0 (PMC9832134; doi:10.1038/s41467-022-35717-0)
Supplement: Supplementary file 9 — Supplementary Data 7 [file 41467_2022_35717_MOESM9_ESM.xlsx]

## Sheet: Sheet1
SrNo	Lineage	Species	MLST	Year	Center	Source	MLST	isolates	RPK-18-0157-1	RBL-17-0228-1	ESBL2036	RBF-17-0514-1	RBF-18-0271-1	RPL-18-0213-1	RPB-16-0320-1	And4961	RBF-18-0335-1	RBG-18-0242-1	RPF-17-0222-2	RPG-17-0577-1	RPK-17-0322-2	RPB-18-0460-1	RPG-17-0504-1	RBF-17-0584-3	RPL-16-0036-1	F-8789	RBL-18-0307-1	BK6227	RBF-18-0023-1	RBL-18-0461-2	RBF-18-0074-1	RPF-18-0247-1	RPK-18-0156-1	RBG-17-0309-2	RBL-18-0029-2	RPK-18-0479-1	RBL-17-0354-2	RBF-17-0338-1	RPK-18-0072-1	RPB-18-0042-1	RPL-18-0150-1	RBL-18-0456-2	BK6664	RBG-16-0046-1	RBL-16-0092-1	RBL-17-0362-1	RBG-17-0246-1	BK7261	F-1367
		E. cloacae	1312	2018	Cologne	rectal swab	-	RPK-18-0157-1	0	19159	18961	18641	46854	46832	47013	46903	46872	46953	46921	46921	46921	46945	46854	46898	46861	46901	46915	46875	46886	46903	46890	46885	46818	46835	46765	56971	47366	46899	46963	46944	47011	47033	46972	47008	46983	46983	45789	45753	45618
		E. cloacae	1313	2017	Lubeck	blood	-	RBL-17-0228-1	19159	0	5120	5600	47334	47289	47440	47331	47325	47378	47346	47346	47346	47367	47320	47373	47308	47343	47368	47309	47359	47310	47342	47337	47265	47247	47159	56813	47447	46971	47089	47046	47095	47078	47101	47090	47076	47077	45557	45479	45384
		E. cloacae	1266	2011	Berlin	PEG (percutaneous endoscopic gastrostomy)	1266	ESBL2036	18961	5120	0	4993	47348	47310	47468	47380	47323	47425	47376	47376	47376	47370	47348	47401	47343	47372	47375	47343	47378	47340	47385	47380	47277	47258	47165	56893	47541	46926	47038	47024	47045	47038	47058	47042	47023	47025	45552	45502	45377
		E. cloacae	462	2017	Freiburg	blood	462	RBF-17-0514-1	18641	5600	4993	0	47335	47301	47456	47367	47343	47418	47359	47359	47359	47367	47335	47392	47329	47340	47397	47330	47371	47354	47403	47398	47268	47254	47167	56901	47645	47053	47163	47123	47152	47158	47174	47160	47162	47164	45697	45639	45517
		E. ludwigii	1278	2018	Freiburg	blood	1278	RBF-18-0271-1	46854	47334	47348	47335	0	3796	3784	3849	3859	4056	3931	3931	3929	3955	3925	3928	3820	3883	3946	3855	3913	3924	3863	3856	3902	3839	4442	57733	49616	48533	48511	48569	48551	48607	48566	48582	48547	48551	47947	48040	47819
		E. ludwigii	1145	2018	Lubeck	rectal swab	1145	RPL-18-0213-1	46832	47289	47310	47301	3796	0	3930	3847	3772	4008	3859	3859	3857	3974	3860	3984	3842	3882	3955	3856	3848	3856	3935	3928	3926	3905	4513	57745	49524	48441	48409	48497	48477	48518	48484	48502	48460	48464	47890	47933	47694
		E. ludwigii	1200	2016	Berlin	rectal swab	1200	RPB-16-0320-1	47013	47440	47468	47456	3784	3930	0	3984	3869	4026	4007	4007	4005	4069	3935	4024	3905	3996	3953	3999	4009	4006	4003	3996	3956	3951	4557	57805	49634	48505	48516	48570	48546	48610	48574	48579	48551	48555	47996	48068	47822
		E. ludwigii	374	2014	Berlin	rectal swab	374	And4961	46903	47331	47380	47367	3849	3847	3984	0	3830	3909	4023	4023	4021	3978	3854	3962	3973	3882	3924	4011	3892	3988	3854	3847	3792	3867	4476	57746	49601	48526	48522	48577	48558	48627	48567	48585	48562	48566	47955	47999	47760
		E. ludwigii	1287	2018	Freiburg	blood	1287	RBF-18-0335-1	46872	47325	47323	47343	3859	3772	3869	3830	0	3050	3951	3951	3949	3680	3794	3848	3844	3905	3841	3890	3567	3976	3841	3836	3914	3846	4456	57695	49497	48388	48379	48434	48405	48479	48441	48454	48416	48418	47849	47926	47674
		E. ludwigii	1286	2018	Giessen	blood	1286	RBG-18-0242-1	46953	47378	47425	47418	4056	4008	4026	3909	3050	0	4090	4090	4088	3621	3849	4056	3733	3925	4057	4038	3826	4108	3923	3918	4026	3972	4574	57794	49579	48496	48472	48543	48519	48576	48529	48560	48515	48519	47937	47994	47782
1		E. ludwigii	1290	2017	Freiburg	rectal swab	1290	RPF-17-0222-2	46921	47346	47376	47359	3931	3859	4007	4023	3951	4090	0	4	6	4039	3783	4039	3871	4030	3943	3910	4016	3911	3920	3915	3933	3891	4499	57778	49607	48555	48545	48598	48575	48637	48587	48594	48558	48562	47974	48053	47832
1		E. ludwigii	1290	2017	Giessen	rectal swab	1290	RPG-17-0577-1	46921	47346	47376	47359	3931	3859	4007	4023	3951	4090	4	0	4	4039	3783	4039	3869	4030	3941	3910	4016	3911	3920	3915	3933	3891	4497	57778	49607	48555	48545	48598	48575	48637	48587	48594	48558	48562	47974	48053	47832
1		E. ludwigii	1290	2017	Cologne	rectal swab	1290	RPK-17-0322-2	46921	47346	47376	47359	3929	3857	4005	4021	3949	4088	6	4	0	4037	3781	4037	3869	4028	3941	3908	4014	3909	3918	3913	3931	3889	4497	57779	49605	48552	48542	48595	48572	48634	48584	48595	48555	48559	47973	48052	47831
		E. ludwigii	1306	2018	Berlin	rectal swab	-	RPB-18-0460-1	46945	47367	47370	47367	3955	3974	4069	3978	3680	3621	4039	4039	4037	0	3872	4049	3939	3935	4019	3929	3769	4009	3959	3952	3950	3971	4572	57801	49561	48494	48489	48537	48515	48571	48540	48564	48512	48516	48032	48083	47831
		E. ludwigii	1289	2017	Giessen	rectal swab	1289	RPG-17-0504-1	46854	47320	47348	47335	3925	3860	3935	3854	3794	3849	3783	3783	3781	3872	0	3923	3828	3886	3917	3912	3844	3784	3868	3863	3858	3854	4457	57665	49552	48419	48411	48466	48448	48487	48469	48465	48447	48451	47887	47928	47712
		E. ludwigii	1273	2017	Freiburg	blood	1273	RBF-17-0584-3	46898	47373	47401	47392	3928	3984	4024	3962	3848	4056	4039	4039	4037	4049	3923	0	3980	3912	4014	3989	3994	3925	3949	3944	3926	3996	4600	57794	49672	48553	48532	48603	48584	48630	48601	48618	48563	48567	48027	48075	47869
		E. ludwigii	1299	2016	Lubeck	rectal swab	1299	RPL-16-0036-1	46861	47308	47343	47329	3820	3842	3905	3973	3844	3733	3871	3869	3869	3939	3828	3980	0	3877	3820	3966	3845	4016	3719	3714	3978	3337	3942	57710	49474	48410	48396	48465	48437	48506	48466	48486	48434	48438	47861	47931	47709
		E. ludwigii	1269	2012	Cologne	blood	1269	F-8789	46901	47343	47372	47340	3883	3882	3996	3882	3905	3925	4030	4030	4028	3935	3886	3912	3877	0	3900	3968	3934	3869	3896	3891	3934	3887	4495	57793	49575	48481	48486	48543	48511	48579	48515	48540	48503	48507	47865	47932	47706
		E. ludwigii	1298	2018	Lubeck	blood	1298	RBL-18-0307-1	46915	47368	47375	47397	3946	3955	3953	3924	3841	4057	3943	3941	3941	4019	3917	4014	3820	3900	0	4012	3931	3996	3946	3939	3882	3772	4379	57797	49610	48499	48470	48552	48520	48573	48545	48559	48510	48514	47907	47964	47724
		E. ludwigii	1271	2014	Tubingen	blood	1271	BK6227	46875	47309	47343	47330	3855	3856	3999	4011	3890	4038	3910	3910	3908	3929	3912	3989	3966	3968	4012	0	3959	3956	3909	3902	3897	3886	4491	57725	49577	48529	48507	48578	48537	48600	48568	48580	48543	48547	47925	47981	47768
		E. ludwigii	1274	2018	Freiburg	blood	1274	RBF-18-0023-1	46886	47359	47378	47371	3913	3848	4009	3892	3567	3826	4016	4016	4014	3769	3844	3994	3845	3934	3931	3959	0	3959	3865	3860	3870	3855	4471	57715	49592	48469	48471	48521	48510	48548	48522	48542	48499	48503	47894	47953	47719
		E. ludwigii	1314	2018	Lubeck	blood	-	RBL-18-0461-2	46903	47310	47340	47354	3924	3856	4006	3988	3976	4108	3911	3911	3909	4009	3784	3925	4016	3869	3996	3956	3959	0	3942	3935	3925	3867	4472	57723	49614	48476	48462	48524	48502	48549	48523	48540	48494	48498	47948	48031	47788
2		E. ludwigii	1275	2018	Freiburg	blood	1275	RBF-18-0074-1	46890	47342	47385	47403	3863	3935	4003	3854	3841	3923	3920	3920	3918	3959	3868	3949	3719	3896	3946	3909	3865	3942	0	15	3895	3816	4427	57762	49563	48441	48432	48502	48460	48520	48494	48500	48460	48464	47906	47953	47694
2		E. ludwigii	1281	2018	Freiburg	rectal swab	1281	RPF-18-0247-1	46885	47337	47380	47398	3856	3928	3996	3847	3836	3918	3915	3915	3913	3952	3863	3944	3714	3891	3939	3902	3860	3935	15	0	3888	3811	4420	57755	49556	48434	48425	48495	48453	48513	48487	48493	48453	48457	47899	47946	47687
		E. ludwigii	1311	2018	Cologne	rectal swab	-	RPK-18-0156-1	46818	47265	47277	47268	3902	3926	3956	3792	3914	4026	3933	3933	3931	3950	3858	3926	3978	3934	3882	3897	3870	3925	3895	3888	0	3819	4426	57739	49553	48446	48458	48508	48475	48547	48500	48523	48479	48483	47897	47937	47703
		E. ludwigii	1307	2017	Giessen	blood	-	RBG-17-0309-2	46835	47247	47258	47254	3839	3905	3951	3867	3846	3972	3891	3891	3889	3971	3854	3996	3337	3887	3772	3886	3855	3867	3816	3811	3819	0	674	57736	49516	48414	48401	48464	48434	48502	48466	48485	48443	48447	47839	47898	47688
		E. ludwigii	253	2018	Lubeck	blood	253	RBL-18-0029-2	46765	47159	47165	47167	4442	4513	4557	4476	4456	4574	4499	4497	4497	4572	4457	4600	3942	4495	4379	4491	4471	4472	4427	4420	4426	674	0	57656	49386	48345	48326	48387	48357	48428	48392	48408	48360	48364	47668	47728	47532
		E. cancerogenus	-	2018	Cologne	rectal swab	-	RPK-18-0479-1	56971	56813	56893	56901	57733	57745	57805	57746	57695	57794	57778	57778	57779	57801	57665	57794	57710	57793	57797	57725	57715	57723	57762	57755	57739	57736	57656	0	52539	56300	56316	56334	56339	56383	56374	56353	56372	56374	53673	53699	53586
		E. tabaci	1295	2017	Lubeck	blood	1295	RBL-17-0354-2	47366	47447	47541	47645	49616	49524	49634	49601	49497	49579	49607	49607	49605	49561	49552	49672	49474	49575	49610	49577	49592	49614	49563	49556	49553	49516	49386	52539	0	43944	43919	43875	43925	43923	43931	43995	43934	43934	40435	40458	40286
		E. kobei	1272	2017	Freiburg	blood	1272	RBF-17-0338-1	46899	46971	46926	47053	48533	48441	48505	48526	48388	48496	48555	48555	48552	48494	48419	48553	48410	48481	48499	48529	48469	48476	48441	48434	48446	48414	48345	56300	43944	0	3404	3193	3209	3334	3379	3406	3396	3402	37316	37160	37249
		E. kobei	1310	2018	Cologne	rectal swab	-	RPK-18-0072-1	46963	47089	47038	47163	48511	48409	48516	48522	48379	48472	48545	48545	48542	48489	48411	48532	48396	48486	48470	48507	48471	48462	48432	48425	48458	48401	48326	56316	43919	3404	0	3318	3303	3421	3365	3400	3414	3420	37312	37167	37239
		E. kobei	1263	2018	Berlin	rectal swab	1263	RPB-18-0042-1	46944	47046	47024	47123	48569	48497	48570	48577	48434	48543	48598	48598	48595	48537	48466	48603	48465	48543	48552	48578	48521	48524	48502	48495	48508	48464	48387	56334	43875	3193	3318	0	3103	3324	3291	3309	3324	3330	37252	37122	37217
		E. kobei	490	2018	Lubeck	rectal swab	490	RPL-18-0150-1	47011	47095	47045	47152	48551	48477	48546	48558	48405	48519	48575	48575	48572	48515	48448	48584	48437	48511	48520	48537	48510	48502	48460	48453	48475	48434	48357	56339	43925	3209	3303	3103	0	3278	3263	3265	3278	3284	37269	37116	37192
		E. kobei	32	2018	Lubeck	blood	32	RBL-18-0456-2	47033	47078	47038	47158	48607	48518	48610	48627	48479	48576	48637	48637	48634	48571	48487	48630	48506	48579	48573	48600	48548	48549	48520	48513	48547	48502	48428	56383	43923	3334	3421	3324	3278	0	3298	3379	3270	3276	37386	37247	37320
		E. kobei	56	2014	Tubingen	abdominal puncture	56	BK6664	46972	47101	47058	47174	48566	48484	48574	48567	48441	48529	48587	48587	48584	48540	48469	48601	48466	48515	48545	48568	48522	48523	48494	48487	48500	48466	48392	56374	43931	3379	3365	3291	3263	3298	0	3098	3201	3207	37361	37218	37287
		E. kobei	1284	2016	Giessen	blood	1284	RBG-16-0046-1	47008	47090	47042	47160	48582	48502	48579	48585	48454	48560	48594	48594	48595	48564	48465	48618	48486	48540	48559	48580	48542	48540	48500	48493	48523	48485	48408	56353	43995	3406	3400	3309	3265	3379	3098	0	2529	2535	37345	37194	37294
3		E. kobei	125	2016	Lubeck	blood	125	RBL-16-0092-1	46983	47076	47023	47162	48547	48460	48551	48562	48416	48515	48558	48558	48555	48512	48447	48563	48434	48503	48510	48543	48499	48494	48460	48453	48479	48443	48360	56372	43934	3396	3414	3324	3278	3270	3201	2529	0	58	37333	37186	37245
3		E. kobei	125	2017	Lubeck	blood	125	RBL-17-0362-1	46983	47077	47025	47164	48551	48464	48555	48566	48418	48519	48562	48562	48559	48516	48451	48567	48438	48507	48514	48547	48503	48498	48464	48457	48483	48447	48364	56374	43934	3402	3420	3330	3284	3276	3207	2535	58	0	37336	37189	37248
		E. bugandensis	599	2017	Giessen	blood	599	RBG-17-0246-1	45789	45557	45552	45697	47947	47890	47996	47955	47849	47937	47974	47974	47973	48032	47887	48027	47861	47865	47907	47925	47894	47948	47906	47899	47897	47839	47668	53673	40435	37316	37312	37252	37269	37386	37361	37345	37333	37336	0	6987	7083
		E. bugandensis	1317	2015	Tubingen	blood	-	BK7261	45753	45479	45502	45639	48040	47933	48068	47999	47926	47994	48053	48053	48052	48083	47928	48075	47931	47932	47964	47981	47953	48031	47953	47946	47937	47898	47728	53699	40458	37160	37167	37122	37116	37247	37218	37194	37186	37189	6987	0	5776
		E. bugandensis	795	2019	Cologne	blood	795	F-1367	45618	45384	45377	45517	47819	47694	47822	47760	47674	47782	47832	47832	47831	47831	47712	47869	47709	47706	47724	47768	47719	47788	47694	47687	47703	47688	47532	53586	40286	37249	37239	37217	37192	37320	37287	37294	37245	37248	7083	5776	0
4		E. bugandensis	1140	2018	Freiburg	rectal swab	1140	RPF-18-0143-1	45681	45404	45382	45532	47879	47793	47902	47835	47760	47840	47896	47896	47895	47925	47787	47926	47783	47776	47802	47855	47795	47883	47793	47786	47804	47734	47578	53654	40345	37178	37196	37143	37145	37276	37247	37247	37215	37218	6949	5775	5548
4		E. bugandensis	1140	2019	Giessen	throat-swab	1140	Survcare220	45675	45400	45378	45528	47870	47784	47893	47826	47751	47831	47887	47887	47886	47916	47776	47917	47774	47767	47793	47846	47786	47874	47784	47777	47795	47725	47569	53647	40335	37174	37192	37139	37141	37272	37243	37244	37211	37214	6954	5780	5552
		E. xiangfangensis	603	2012	Berlin	rectal swab	603	ESBL3012	48051	47176	47562	47647	49590	49605	49646	49627	49547	49644	49615	49615	49619	49615	49561	49666	49481	49622	49649	49656	49602	49583	49612	49605	49558	49385	48721	52952	43000	45591	45613	45593	45635	45638	45616	45631	45605	45607	39695	39680	39499
		#N/A	#N/A	#N/A	#N/A	#N/A	#N/A	Reference	48051	47176	47562	47647	49590	49605	49646	49627	49547	49644	49615	49615	49619	49615	49561	49666	49481	49622	49649	49656	49602	49583	49612	49605	49558	49385	48721	52952	43000	45591	45613	45593	45635	45638	45616	45631	45605	45607	39695	39680	39499
		E. chengduensis	666	2018	Cologne	blood	666	RBK-18-0141-1	45829	45940	45958	46005	47911	47902	47964	47924	47825	47890	47916	47916	47915	47944	47883	48009	47816	47899	47934	47942	47839	47894	47861	47858	47824	47867	47759	54048	39475	37566	37553	37553	37546	37608	37576	37591	37537	37542	36222	36270	36171
		unidentified	1267	2014	Cologne	blood	1267	F-147	45655	45832	45799	45886	47248	47238	47250	47288	47119	47233	47301	47303	47303	47286	47254	47365	47178	47259	47299	47272	47239	47295	47231	47224	47241	47154	47051	55334	39109	39351	39378	39404	39417	39487	39459	39485	39429	39430	36275	36373	36259
		E. asburiae	25	2012	Tubingen	blood	25	BK5433	44034	44233	44304	44302	45455	45445	45484	45453	45356	45437	45481	45481	45480	45482	45392	45560	45384	45465	45494	45467	45443	45474	45437	45430	45410	45374	45283	53206	34833	37052	37068	37098	37146	37179	37152	37136	37122	37128	34066	34004	33895
		E. asburiae	252	2018	Giessen	blood	252	RBG-18-0415-1	44729	44898	44909	44987	46339	46341	46381	46395	46255	46363	46393	46393	46392	46397	46337	46452	46284	46363	46404	46358	46348	46389	46338	46331	46331	46279	46185	53810	35859	37934	37957	37959	37968	38047	37969	38023	37975	37981	34856	34806	34656
		E. roggenkampii	41	2018	Tubingen	rectal swab	41	RPT-18-0057-1	43840	44142	44129	44254	46295	46279	46350	46313	46247	46302	46321	46319	46320	46365	46257	46369	46257	46325	46330	46282	46287	46324	46272	46265	46221	46208	46104	54258	39246	38272	38289	38281	38301	38391	38329	38294	38293	38298	34454	34675	34578
		E. roggenkampii	515	2016	Cologne	rectal swab	515	RPK-16-0191-2	43684	43862	43881	43944	46362	46341	46403	46364	46258	46338	46389	46389	46388	46410	46305	46432	46293	46367	46378	46338	46325	46380	46316	46309	46291	46248	46156	54183	39279	38246	38267	38252	38300	38362	38315	38289	38270	38274	34499	34705	34644
		E. roggenkampii	1201	2017	Berlin	rectal swab	1201	RPB-17-0516-2	43764	43935	43939	44008	46215	46229	46244	46228	46142	46225	46240	46240	46239	46304	46183	46313	46164	46224	46246	46228	46211	46232	46184	46177	46176	46118	46032	54198	39174	38230	38262	38247	38271	38354	38315	38253	38280	38284	34419	34633	34549
		E. roggenkampii	272	2017	Giessen	rectal swab	272	RPG-17-0579-1	43703	43926	43950	44012	46172	46163	46197	46153	46074	46158	46176	46176	46175	46225	46115	46220	46102	46156	46187	46127	46157	46190	46093	46086	46108	46066	45975	54190	39041	38160	38179	38182	38209	38278	38240	38187	38176	38181	34309	34525	34465
		E. roggenkampii	1302	2017	Tubingen	rectal swab	1302	RPT-17-0298-1	43847	44032	44047	44130	46306	46327	46309	46305	46224	46297	46339	46339	46338	46378	46265	46372	46248	46327	46320	46286	46283	46329	46254	46247	46248	46193	46097	54164	39110	38322	38350	38341	38360	38437	38392	38360	38358	38363	34491	34641	34588
		E. roggenkampii	1292	2017	Cologne	blood	1292	RBK-17-0344-2	43846	43990	43996	44095	46257	46255	46282	46251	46165	46236	46265	46265	46264	46303	46193	46335	46176	46238	46283	46224	46235	46267	46217	46210	46186	46133	46048	54188	39152	38368	38377	38377	38400	38478	38418	38391	38371	38376	34445	34680	34583
		E. roggenkampii	1294	2018	Cologne	rectal swab	1294	RPK-18-0503-2	43807	43993	43992	44042	46308	46314	46345	46315	46228	46302	46347	46347	46346	46390	46253	46392	46243	46315	46335	46289	46287	46337	46272	46265	46258	46208	46125	54254	39196	38302	38333	38322	38360	38415	38371	38339	38331	38333	34535	34731	34662
		E. roggenkampii	165	2018	Cologne	rectal swab	165	RPK-18-0173-1	43732	43956	43981	44045	46338	46324	46367	46329	46242	46301	46337	46337	46335	46395	46270	46405	46258	46351	46348	46287	46302	46321	46284	46277	46261	46224	46134	54218	39225	38292	38323	38292	38325	38403	38373	38325	38304	38308	34475	34671	34625
		E. roggenkampii	466	2018	Cologne	rectal swab	466	RPK-18-0524-1	43725	43922	43929	43992	46311	46277	46335	46292	46198	46265	46301	46301	46299	46368	46242	46369	46231	46300	46327	46271	46274	46293	46238	46231	46218	46188	46108	54187	39187	38250	38276	38254	38301	38358	38339	38279	38272	38276	34416	34638	34584
		E. wuhouensis	1270	2013	Cologne	blood	1270	F00728	50332	49548	49737	49854	52132	52050	52171	52101	52072	52140	52165	52165	52167	52148	52087	52177	52040	52136	52108	52124	52090	52108	52133	52126	52122	52026	51647	54112	45322	47627	47626	47625	47641	47711	47652	47711	47671	47674	38348	38182	38072
		E. xiangfangensis	1283	2018	Freiburg	rectal swab	1283	RPF-18-0297-1	49997	49260	49576	49608	51650	51643	51727	51684	51610	51698	51671	51671	51675	51697	51621	51714	51573	51672	51723	51678	51621	51677	51724	51717	51645	51529	51051	54550	44958	47571	47606	47573	47622	47641	47603	47620	47598	47599	41647	41550	41396
		E. xiangfangensis	1277	2018	Freiburg	blood	1277	RBF-18-0266-1	49881	49133	49413	49472	51588	51608	51652	51612	51555	51623	51608	51608	51612	51610	51573	51646	51489	51620	51645	51610	51532	51615	51636	51629	51592	51459	50991	54456	44832	47466	47500	47478	47533	47548	47487	47516	47501	47500	41492	41444	41308
		E. xiangfangensis	102	2017	Berlin	blood	102	RBB-17-0902-1	49902	49187	49488	49516	51630	51624	51675	51647	51587	51663	51657	51657	51661	51672	51603	51678	51519	51635	51674	51654	51585	51646	51682	51675	51629	51486	51010	54552	44924	47590	47611	47585	47649	47649	47607	47653	47618	47619	41636	41573	41436
		E. xiangfangensis	233	2017	Lubeck	blood	233	RBL-17-0146-1	49830	49109	49407	49452	51530	51518	51616	51575	51499	51554	51564	51564	51568	51572	51513	51597	51438	51565	51610	51561	51500	51569	51592	51585	51540	51393	50917	54501	44876	47520	47569	47527	47571	47603	47543	47604	47551	47552	41591	41519	41365
		E. xiangfangensis	97	2018	Lubeck	rectal swab	97	RPL-18-0075-1	49974	49226	49519	49555	51661	51661	51731	51689	51620	51684	51687	51687	51691	51679	51631	51726	51563	51695	51721	51699	51629	51688	51717	51710	51660	51538	51063	54579	44946	47630	47656	47644	47682	47702	47651	47689	47661	47662	41635	41595	41450
5	II	E. xiangfangensis	168	2017	Giessen	blood	168	RBG-17-0085-1	49855	49128	49424	49450	51578	51561	51635	51586	51544	51609	51605	51605	51609	51589	51546	51634	51453	51608	51626	51590	51514	51612	51632	51625	51579	51441	50971	54465	44877	47483	47533	47517	47559	47575	47538	47562	47532	47533	41531	41482	41346
5	II	E. xiangfangensis	168	2017	Giessen	blood	168	RBG-17-0358-1	49853	49127	49425	49449	51575	51558	51632	51582	51541	51606	51602	51602	51606	51586	51543	51631	51450	51605	51623	51587	51510	51609	51629	51622	51576	51438	50968	54466	44876	47483	47531	47515	47559	47573	47536	47560	47530	47531	41530	41481	41345
5	II	E. xiangfangensis	168	2017	Giessen	blood	168	RBG-17-0389-1	49853	49127	49425	49449	51575	51558	51632	51582	51541	51606	51602	51602	51606	51586	51543	51631	51450	51605	51623	51587	51510	51609	51629	51622	51576	51438	50968	54466	44876	47483	47531	47515	47559	47573	47536	47560	47530	47531	41530	41481	41345
6	II	E. xiangfangensis	78	2018	Lubeck	blood	78	RBL-18-0105-1	49926	49166	49468	49498	51578	51570	51650	51614	51532	51599	51587	51587	51591	51611	51547	51632	51462	51589	51650	51601	51539	51610	51632	51625	51584	51439	50971	54521	44904	47564	47605	47570	47627	47643	47589	47636	47599	47600	41565	41513	41348
6	II	E. xiangfangensis	78	2018	Freiburg	blood	78	RBF-18-0378-1	49914	49153	49455	49485	51565	51557	51637	51601	51519	51587	51576	51576	51580	51600	51534	51619	51449	51577	51637	51588	51526	51597	51619	51612	51571	51426	50958	54510	44895	47549	47590	47555	47612	47626	47574	47621	47582	47583	41553	41501	41336
6	II	E. xiangfangensis	78	2017	Tubingen	rectal swab	78	RPT-17-0081-1	49917	49156	49458	49488	51568	51560	51640	51604	51522	51590	51579	51579	51583	51603	51537	51622	51452	51580	51640	51591	51529	51600	51622	51615	51574	51429	50961	54513	44898	47552	47593	47558	47615	47629	47577	47624	47585	47586	41556	41504	41339
7	II	E. xiangfangensis	118	2018	Lubeck	blood	118	RBL-18-0073-2	49897	49184	49493	49528	51545	51547	51619	51578	51515	51585	51566	51566	51570	51568	51526	51603	51436	51576	51603	51566	51497	51567	51600	51593	51554	51409	50942	54483	44899	47542	47584	47550	47622	47619	47597	47628	47579	47580	41554	41510	41349
7	II	E. xiangfangensis	118	2018	Berlin	rectal swab	118	RPB-18-0456-1	49906	49196	49505	49538	51552	51554	51626	51585	51522	51592	51573	51573	51577	51575	51533	51610	51443	51583	51610	51573	51505	51577	51607	51600	51561	51416	50949	54488	44901	47548	47590	47556	47628	47625	47603	47634	47585	47586	41560	41514	41353
8	II	E. xiangfangensis	104	2016	Berlin	blood	104	RBB-16-0116-1	49958	49209	49504	49539	51635	51625	51694	51655	51601	51660	51657	51657	51661	51659	51593	51674	51536	51657	51693	51646	51587	51652	51691	51684	51637	51501	51025	54503	44941	47580	47614	47578	47642	47665	47622	47648	47623	47624	41609	41512	41376
8	II	E. xiangfangensis	104	2016	Cologne	blood	104	RBK-16-0078-3	49955	49205	49500	49535	51634	51624	51693	51654	51600	51659	51656	51656	51660	51658	51592	51673	51535	51656	51692	51645	51586	51651	51690	51683	51636	51500	51024	54502	44942	47579	47615	47577	47641	47664	47621	47647	47622	47623	41608	41510	41374
		E. xiangfangensis	1316	2013	Tubingen	blood	-	BK6046	49910	49176	49475	49517	51555	51546	51616	51562	51523	51574	51579	51579	51583	51588	51540	51598	51457	51592	51624	51582	51515	51581	51621	51614	51552	51428	50950	54498	44887	47510	47537	47511	47575	47588	47540	47576	47535	47536	41601	41529	41390
		E. xiangfangensis	135	2018	Lubeck	blood	135	RBL-18-0082-1	49920	49184	49484	49525	51565	51557	51626	51572	51533	51584	51589	51589	51593	51598	51551	51608	51467	51602	51634	51592	51525	51592	51631	51624	51562	51438	50960	54497	44893	47519	47544	47522	47584	47599	47549	47585	47544	47545	41610	41538	41399
		E. xiangfangensis	1148	2016	Tubingen	rectal swab	1148	RPT-16-0254-2	49877	49128	49433	49477	51545	51563	51616	51583	51516	51599	51566	51566	51570	51591	51513	51603	51479	51584	51613	51584	51504	51557	51605	51598	51544	51413	50934	54483	44881	47532	47579	47545	47595	47607	47566	47596	47572	47573	41532	41472	41349
		E. xiangfangensis	278	2017	Lubeck	blood	278	RBL-17-0167-1	49895	49181	49495	49518	51620	51602	51681	51639	51585	51650	51654	51654	51658	51658	51589	51687	51510	51654	51689	51658	51594	51635	51687	51680	51618	51492	51020	54458	44864	47488	47520	47480	47544	47563	47524	47557	47523	47524	41567	41506	41352
		E. xiangfangensis	118	2018	Cologne	rectal swab	118	RPK-18-0503-1	49794	49065	49360	49400	51560	51537	51614	51557	51510	51574	51589	51589	51593	51583	51518	51584	51453	51567	51618	51568	51500	51580	51601	51594	51539	51412	50937	54446	44826	47438	47491	47454	47516	47505	47469	47508	47473	47474	41503	41441	41301
		E. xiangfangensis	1280	2018	Freiburg	rectal swab	1280	RPF-18-0104-1	49963	49220	49536	49575	51607	51607	51667	51629	51582	51631	51625	51625	51629	51637	51594	51663	51512	51637	51676	51640	51573	51646	51673	51666	51603	51477	50992	54531	44997	47609	47634	47617	47672	47686	47620	47672	47631	47632	41638	41563	41418
9	II	E. xiangfangensis	419	2017	Freiburg	blood	419	RBF-17-0511-1	49966	49188	49497	49541	51628	51621	51689	51635	51584	51637	51649	51649	51653	51659	51607	51677	51516	51655	51691	51656	51594	51650	51675	51668	51636	51485	51015	54537	44983	47615	47666	47625	47690	47698	47648	47683	47653	47654	41638	41585	41422
9	II	E. xiangfangensis	419	2018	Freiburg	blood	419	RBF-18-0052-1	49965	49184	49494	49538	51626	51619	51687	51633	51582	51635	51647	51647	51651	51657	51605	51675	51514	51653	51689	51654	51592	51648	51673	51666	51634	51483	51013	54539	44979	47615	47666	47625	47690	47698	47648	47683	47653	47654	41637	41584	41421
		E. xiangfangensis	327	2018	Lubeck	blood	327	RBL-18-0072-1	49872	49143	49438	49474	51545	51549	51602	51580	51513	51598	51571	51571	51575	51587	51530	51608	51447	51576	51609	51575	51514	51581	51607	51600	51557	51425	50945	54435	44801	47496	47530	47499	47568	47571	47529	47555	47524	47525	41529	41470	41309
		E. xiangfangensis	1199	2017	Berlin	rectal swab	1199	RPB-17-0441-1	49836	49087	49387	49441	51555	51538	51611	51577	51523	51599	51576	51576	51580	51584	51526	51614	51463	51564	51624	51586	51515	51586	51624	51617	51556	51424	50947	54416	44820	47455	47511	47484	47534	47539	47505	47531	47506	47508	41512	41462	41300
		E. xiangfangensis	1315	2018	Lubeck	rectal swab	-	RPL-18-0211-3	49820	49087	49388	49433	51493	51488	51566	51507	51451	51531	51511	51511	51515	51529	51467	51550	51410	51518	51560	51526	51460	51513	51554	51547	51505	51354	50875	54396	44885	47479	47514	47474	47530	47559	47505	47542	47504	47505	41496	41445	41286
		E. xiangfangensis	121	2017	Freiburg	blood	121	RBF-17-0256-1	49077	48246	48522	48578	50931	50902	50954	50937	50855	50932	50938	50938	50942	50921	50849	50962	50795	50912	50960	50961	50890	50946	50918	50911	50908	50748	50217	53954	44067	46570	46583	46575	46609	46623	46575	46620	46594	46596	40532	40454	40333
		E. xiangfangensis	-	2011	Berlin	(catheter) urine	-	And1463	49049	48307	48571	48642	50883	50840	50882	50885	50785	50887	50872	50872	50876	50859	50806	50902	50745	50855	50896	50889	50818	50870	50855	50848	50843	50677	50134	53925	44045	46566	46576	46553	46588	46621	46573	46605	46578	46582	40594	40503	40378
		E. xiangfangensis	511	2018	Freiburg	blood	511	RBF-18-0224-1	48981	48219	48485	48565	50819	50778	50825	50826	50727	50830	50822	50822	50826	50802	50742	50838	50680	50797	50840	50814	50763	50796	50796	50789	50787	50613	50075	53835	44029	46537	46527	46517	46551	46583	46526	46573	46538	46540	40544	40447	40305
		E. xiangfangensis	344	2018	Giessen	blood	344	RBG-18-0378-1	48995	48232	48497	48578	50866	50831	50867	50869	50776	50868	50861	50861	50865	50842	50782	50878	50718	50836	50889	50863	50798	50846	50827	50820	50825	50677	50138	53876	44030	46551	46568	46547	46578	46610	46559	46602	46573	46575	40484	40409	40268
		E. xiangfangensis	144	2015	Berlin	rectal swab	144	And6885	49102	48301	48583	48653	50991	50950	50980	50996	50903	50984	51002	51002	51006	50977	50918	51008	50841	50971	51006	50996	50948	50982	50959	50952	50968	50793	50254	53907	44222	46645	46668	46643	46691	46702	46665	46699	46653	46655	40592	40486	40381
		E. xiangfangensis	120	2018	Berlin	rectal swab	120	RPB-18-0433-1	49061	48261	48523	48588	50893	50866	50911	50910	50831	50898	50919	50919	50923	50882	50826	50939	50770	50894	50927	50911	50886	50897	50894	50887	50874	50710	50187	53938	44091	46579	46589	46571	46619	46644	46599	46631	46594	46596	40473	40407	40259
		E. xiangfangensis	182	2013	Berlin	C-Flasche?	182	And2481	49034	48246	48514	48593	50873	50831	50885	50889	50793	50864	50888	50888	50892	50854	50793	50897	50741	50855	50907	50888	50854	50861	50853	50846	50842	50679	50152	53911	44079	46546	46562	46546	46588	46606	46560	46588	46550	46552	40555	40477	40342
		E. xiangfangensis	296	2018	Cologne	blood	296	RBK-18-0208-1	49010	48210	48490	48560	50894	50864	50907	50924	50810	50891	50907	50907	50911	50866	50819	50927	50774	50896	50927	50910	50861	50897	50887	50880	50861	50703	50168	53875	44146	46550	46563	46543	46590	46606	46561	46590	46573	46575	40554	40472	40340
		E. xiangfangensis	1265	2013	Berlin	rectal swab	1265	And2854	48942	48131	48412	48493	50812	50772	50821	50806	50724	50804	50802	50802	50806	50796	50734	50843	50670	50801	50830	50816	50763	50825	50796	50789	50779	50607	50081	53805	43974	46508	46538	46529	46556	46599	46548	46577	46540	46542	40433	40357	40228
		E. xiangfangensis	986	2017	Lubeck	blood	986	RBL-17-0419-2	49003	48193	48479	48528	50823	50777	50824	50825	50753	50823	50851	50851	50855	50806	50740	50850	50684	50800	50847	50840	50775	50833	50795	50788	50803	50644	50120	53865	44000	46478	46503	46497	46528	46548	46489	46535	46520	46522	40477	40353	40245
		E. xiangfangensis	1282	2018	Freiburg	rectal swab	1282	RPF-18-0265-1	49014	48232	48521	48570	50755	50737	50791	50780	50700	50777	50774	50774	50778	50748	50695	50802	50651	50745	50806	50794	50717	50772	50764	50757	50745	50592	50063	53874	44042	46504	46526	46528	46560	46567	46528	46558	46519	46523	40479	40389	40277
		E. xiangfangensis	68	2016	Freiburg	blood	68	RBF-16-0042-1	48076	47223	47563	47609	49869	49869	49913	49858	49787	49896	49901	49901	49905	49876	49836	49929	49754	49911	49905	49921	49836	49874	49878	49871	49836	49664	49112	53037	43323	45790	45795	45776	45834	45829	45828	45828	45798	45801	39633	39565	39444
		E. xiangfangensis	68	2018	Giessen	blood	68	RBG-18-0241-1	48170	47305	47642	47681	49943	49933	49985	49947	49868	49975	49973	49973	49977	49954	49907	50003	49833	49982	49992	50003	49921	49956	49956	49949	49915	49741	49190	53108	43380	45818	45818	45805	45860	45847	45851	45852	45823	45825	39713	39620	39500
10	IV	E. xiangfangensis	108	2017	Cologne	blood	108	RBK-17-0398-1	48156	47340	47668	47735	49933	49924	49952	49938	49860	49962	49931	49931	49935	49936	49911	49985	49824	49955	49994	49963	49887	49939	49968	49961	49891	49742	49189	53016	43450	45774	45763	45740	45792	45816	45786	45815	45774	45774	39828	39792	39601
10	IV	E. xiangfangensis	108	2017	Lubeck	blood	108	RBL-17-0312-2	48133	47317	47644	47711	49906	49897	49927	49911	49833	49935	49904	49904	49908	49909	49884	49958	49801	49928	49967	49938	49862	49914	49941	49934	49864	49719	49166	52991	43425	45742	45733	45708	45760	45785	45756	45783	45744	45744	39803	39765	39576
10	IV	E. xiangfangensis	108	2018	Berlin	rectal swab	108	RPB-18-0431-1	48157	47338	47666	47733	49930	49921	49951	49935	49857	49959	49930	49930	49934	49933	49908	49982	49823	49952	49991	49962	49886	49936	49965	49958	49888	49741	49188	53018	43450	45774	45764	45740	45792	45816	45786	45815	45776	45776	39828	39792	39601
10	IV	E. xiangfangensis	108	2017	Lubeck	blood	108	RBL-17-0298-1	48157	47338	47667	47734	49931	49922	49952	49936	49858	49960	49931	49931	49935	49934	49909	49983	49824	49953	49992	49963	49887	49937	49966	49959	49889	49742	49189	53014	43448	45771	45761	45737	45789	45813	45785	45812	45773	45773	39826	39790	39599
10	IV	E. xiangfangensis	108	2018	Lubeck	blood	108	RBL-18-0138-1	48163	47345	47673	47740	49937	49928	49958	49942	49864	49966	49937	49937	49941	49940	49915	49989	49830	49959	49998	49969	49893	49943	49972	49965	49895	49748	49195	53023	43457	45777	45767	45743	45795	45819	45791	45818	45779	45779	39835	39798	39608
		E. xiangfangensis	664	2017	Cologne	blood	664	RBK-17-0305-1	48326	47434	47794	47877	49992	50005	50029	50036	49934	50030	50019	50019	50023	50014	49960	50063	49870	50030	50051	50048	49977	49989	50017	50010	49963	49809	49206	53284	43257	45905	45924	45914	45934	45969	45934	45953	45919	45921	40039	39998	39859
		E. xiangfangensis	113	2017	Cologne	blood	113	RBK-17-0497-1	48253	47360	47725	47823	49952	49955	49984	49974	49908	49981	49954	49954	49958	49964	49914	50033	49836	49982	49982	50005	49939	49932	49962	49955	49889	49752	49134	53125	43191	45805	45799	45795	45829	45855	45825	45840	45802	45805	39948	39938	39786
11	I	E. xiangfangensis	133	2017	Giessen	blood	133	RBG-17-0272-1	48317	47433	47814	47886	49998	49982	50006	50014	49935	50026	49992	49992	49996	50000	49941	50050	49884	50008	50038	50014	49979	49974	50011	50004	49951	49789	49177	53227	43281	45879	45895	45883	45917	45937	45917	45928	45888	45891	40057	39998	39821
11	I	E. xiangfangensis	133	2017	Giessen	blood	133	RBG-17-0018-1	48319	47435	47816	47888	49998	49980	50006	50014	49935	50026	49992	49992	49996	50000	49941	50050	49884	50008	50038	50012	49980	49974	50011	50004	49951	49789	49177	53229	43284	45881	45897	45885	45919	45939	45919	45930	45890	45893	40057	39998	39821
11	I	E. xiangfangensis	133	2017	Cologne	rectal swab	133	RPK-17-0332-1	48313	47430	47811	47883	49994	49978	50002	50010	49929	50020	49988	49988	49992	49996	49937	50044	49878	50004	50032	50010	49974	49970	50007	50000	49947	49785	49173	53229	43282	45875	45891	45879	45913	45933	45913	45924	45884	45887	40054	39996	39817
		E. xiangfangensis	831	2015	Tubingen	blood	831	BK6928	48220	47357	47723	47823	49869	49886	49913	49912	49828	49925	49893	49893	49897	49896	49853	49954	49769	49910	49907	49922	49866	49870	49906	49899	49863	49686	49074	53155	43165	45809	45823	45815	45858	45882	45840	45867	45823	45825	39953	39959	39792
12	I	E. xiangfangensis	93	2015	Berlin	abdominal puncture	93	And8437	48249	47395	47760	47852	49938	49954	49989	49968	49889	49959	49962	49962	49966	49966	49914	50006	49833	49967	49985	49998	49928	49940	49960	49953	49893	49741	49120	53182	43146	45802	45827	45812	45846	45877	45836	45869	45829	45831	39927	39909	39751
12	I	E. xiangfangensis	177	2017	Berlin	rectal swab	177	RPB-17-0076-1	48243	47389	47754	47845	49929	49944	49980	49959	49880	49950	49952	49952	49956	49956	49904	49996	49823	49957	49976	49989	49918	49930	49950	49943	49883	49731	49110	53178	43141	45801	45825	45809	45842	45874	45834	45863	45826	45828	39919	39902	39744
13	I	E. xiangfangensis	190	2011	Tubingen	blood	190	BK4767	48200	47368	47739	47833	49915	49930	49968	49958	49864	49942	49938	49938	49942	49937	49895	49953	49807	49944	49964	49971	49897	49909	49938	49931	49887	49712	49097	53172	43168	45799	45835	45816	45855	45869	45841	45866	45833	45835	39922	39902	39745
13	I	E. xiangfangensis	190	2018	Giessen	blood	190	RBG-18-0186-1	48198	47368	47739	47833	49916	49931	49969	49959	49865	49943	49939	49939	49943	49938	49896	49954	49808	49945	49965	49972	49898	49910	49939	49932	49888	49713	49098	53170	43167	45796	45832	45813	45852	45866	45838	45863	45830	45832	39923	39903	39746
13	I	E. xiangfangensis	190	2016	Lubeck	blood	190	RBL-16-0059-1	48209	47378	47748	47842	49925	49942	49980	49969	49876	49954	49950	49950	49954	49947	49908	49963	49821	49956	49976	49983	49907	49921	49949	49942	49899	49724	49109	53181	43178	45808	45843	45824	45863	45877	45849	45874	45841	45843	39931	39911	39754
13	I	E. xiangfangensis	190	2017	Lubeck	blood	190	RBL-17-0079-1	48202	47371	47741	47835	49920	49937	49975	49964	49871	49949	49945	49945	49949	49942	49903	49958	49814	49951	49971	49978	49902	49916	49942	49935	49894	49719	49104	53176	43170	45801	45836	45817	45856	45870	45842	45867	45834	45836	39924	39904	39747
13	I	E. xiangfangensis	190	2016	Lubeck	rectal swab	190	RPL-16-0286-1	48202	47371	47741	47835	49920	49937	49975	49964	49871	49949	49945	49945	49949	49942	49903	49958	49814	49951	49971	49978	49902	49916	49942	49935	49894	49719	49104	53176	43170	45801	45836	45817	45856	45870	45842	45867	45834	45836	39924	39904	39747
13	I	E. xiangfangensis	190	2017	Freiburg	rectal swab	190	RPF-17-0168-1	48205	47374	47744	47838	49920	49937	49975	49964	49870	49948	49945	49945	49949	49941	49902	49957	49814	49951	49970	49978	49901	49915	49945	49938	49893	49719	49104	53179	43174	45802	45838	45819	45858	45872	45844	45869	45836	45838	39926	39906	39749
13	I	E. xiangfangensis	190	2017	Cologne	blood	190	RBK-17-0394-1	48225	47396	47766	47860	49942	49959	49997	49987	49893	49971	49965	49965	49969	49964	49925	49980	49834	49973	49993	50000	49924	49938	49967	49960	49916	49739	49124	53202	43198	45827	45863	45844	45883	45897	45868	45894	45861	45863	39951	39931	39774
13	I	E. xiangfangensis	190	2016	Cologne	rectal swab	190	RPK-16-0522-1	48191	47359	47730	47824	49914	49929	49967	49957	49863	49941	49937	49937	49941	49936	49895	49952	49806	49943	49963	49970	49896	49908	49937	49930	49886	49711	49096	53168	43165	45797	45833	45814	45853	45865	45839	45864	45831	45833	39921	39901	39744
		E. xiangfangensis	662	2018	Freiburg	blood	662	RBF-18-0302-3	48284	47441	47794	47872	50000	50010	50032	50028	49934	50029	50011	50011	50015	50003	49944	50072	49872	50026	50042	50043	49966	49992	49997	49990	49947	49794	49182	53117	43250	45800	45805	45809	45819	45864	45829	45826	45800	45802	39954	39906	39748
14	I	E. xiangfangensis	50	2018	Freiburg	blood	50	RBF-18-0318-1	48190	47331	47718	47794	49848	49842	49861	49865	49787	49869	49849	49849	49853	49850	49824	49910	49717	49867	49885	49881	49835	49850	49858	49851	49814	49636	49027	53032	43119	45716	45720	45720	45748	45781	45756	45747	45716	45719	39890	39818	39673
14	I	E. xiangfangensis	50	2017	Berlin	rectal swab	50	RPB-17-0356-1	48186	47326	47713	47789	49846	49840	49859	49863	49785	49867	49848	49848	49852	49848	49822	49909	49715	49865	49883	49879	49833	49848	49856	49849	49812	49634	49025	53031	43114	45711	45715	45715	45743	45776	45751	45742	45711	45714	39887	39815	39670
14	I	E. xiangfangensis	50	2018	Berlin	rectal swab	50	RPB-18-0151-1	48191	47331	47718	47794	49853	49847	49866	49870	49792	49874	49855	49855	49859	49855	49829	49916	49722	49872	49890	49886	49840	49855	49863	49856	49819	49641	49032	53040	43122	45718	45722	45722	45750	45783	45758	45749	45718	45721	39894	39822	39677
14	I	E. xiangfangensis	50	2018	Cologne	rectal swab	50	RPK-18-0360-1	48191	47331	47718	47794	49853	49847	49866	49870	49792	49874	49855	49855	49859	49855	49829	49916	49722	49872	49890	49886	49840	49855	49863	49856	49819	49641	49032	53040	43122	45718	45722	45722	45750	45783	45758	45749	45718	45721	39894	39822	39677
14	I	E. xiangfangensis	50	2017	Cologne	blood	50	RBK-17-0230-1	48193	47332	47719	47795	49856	49848	49867	49871	49793	49875	49858	49858	49862	49858	49830	49917	49722	49874	49892	49887	49843	49854	49866	49859	49820	49642	49033	53040	43121	45715	45719	45719	45747	45780	45755	45746	45715	45718	39894	39821	39674
14	I	E. xiangfangensis	50	2017	Cologne	rectal swab	50	RPK-17-0325-1	48188	47327	47714	47790	49848	49842	49861	49865	49787	49869	49850	49850	49854	49850	49824	49911	49716	49867	49885	49881	49835	49850	49858	49851	49814	49636	49027	53032	43116	45713	45717	45717	45745	45778	45753	45744	45713	45716	39890	39818	39672
14	I	E. xiangfangensis	50	2017	Cologne	blood	50	RBK-17-0399-1	48184	47323	47710	47786	49850	49844	49863	49867	49789	49871	49852	49852	49856	49852	49826	49913	49718	49870	49887	49883	49837	49851	49860	49853	49814	49638	49029	53034	43112	45710	45714	45712	45740	45775	45750	45741	45710	45713	39890	39818	39672
14	I	E. xiangfangensis	50	2017	Lubeck	blood	50	RBL-17-0286-1	48185	47324	47711	47787	49844	49838	49857	49861	49783	49865	49846	49846	49850	49846	49820	49907	49712	49864	49881	49877	49831	49846	49854	49847	49810	49632	49023	53030	43113	45711	45715	45715	45743	45776	45751	45742	45711	45714	39887	39815	39669
		E. xiangfangensis	1305	2018	Berlin	rectal swab	-	RPB-18-0431-2	48242	47427	47820	47903	49913	49915	49938	49934	49868	49952	49933	49933	49937	49930	49876	49980	49790	49948	49956	49969	49917	49921	49926	49919	49880	49723	49104	53186	43200	45759	45769	45781	45801	45831	45799	45809	45766	45769	39943	39912	39774
		E. xiangfangensis	1309	2018	Cologne	blood	-	RBK-18-0386-2	48162	47336	47700	47803	49874	49879	49910	49916	49815	49908	49896	49896	49900	49906	49853	49946	49757	49882	49912	49915	49847	49881	49890	49883	49829	49689	49071	53103	43118	45771	45782	45786	45812	45840	45801	45814	45789	45792	39955	39894	39773
		E. xiangfangensis	1116	2017	Giessen	blood	1116	RBG-17-0257-1	48189	47277	47660	47770	49828	49840	49867	49862	49784	49876	49849	49849	49853	49862	49814	49902	49722	49870	49888	49871	49821	49820	49848	49841	49809	49633	49014	53118	43192	45735	45790	45755	45798	45815	45777	45797	45768	45770	39895	39810	39683
		E. xiangfangensis	533	2018	Berlin	rectal swab	533	RPB-18-0510-1	48333	47460	47823	47943	49978	49969	50010	50005	49922	50012	49989	49989	49993	50012	49920	50045	49864	50008	50027	50028	49967	49949	49980	49973	49958	49787	49163	53242	43286	45896	45890	45878	45925	45945	45921	45915	45886	45888	40054	40026	39839
		E. xiangfangensis	62	2017	Lubeck	blood	62	RBL-17-0250-3	48304	47434	47822	47896	49972	49961	49993	50010	49912	50005	50003	50003	50007	49983	49930	50023	49866	49997	49997	50025	49950	49959	49984	49977	49923	49771	49142	53196	43252	45829	45841	45827	45863	45880	45851	45866	45841	45843	40012	39989	39805
15	I	E. xiangfangensis	134	2017	Lubeck	blood	134	RBL-17-0180-1	48285	47387	47776	47863	49934	49932	49962	49938	49862	49936	49940	49940	49944	49938	49876	49974	49799	49965	49965	49979	49916	49921	49926	49919	49876	49726	49112	53161	43217	45829	45853	45832	45860	45881	45853	45860	45835	45837	39976	39923	39775
15	I	E. xiangfangensis	134	2017	Lubeck	rectal swab	134	RPL-17-0177-1	48268	47372	47761	47848	49919	49919	49947	49923	49847	49921	49926	49926	49930	49922	49863	49959	49784	49950	49950	49964	49901	49906	49911	49904	49861	49711	49097	53153	43205	45816	45840	45819	45847	45868	45840	45845	45822	45824	39959	39907	39758
		E. xiangfangensis	742	2017	Berlin	rectal swab	742	RPB-17-0516-3	48305	47390	47763	47869	50005	50001	50050	50036	49951	50030	50042	50042	50046	50009	49978	50073	49881	50026	50069	50051	49991	49992	50017	50010	49975	49813	49190	53240	43256	45860	45879	45883	45900	45942	45906	45903	45881	45883	40072	40018	39869
		E. xiangfangensis	89	2018	Lubeck	blood	89	RBL-18-0346-1	48244	47393	47766	47867	49897	49901	49931	49942	49846	49939	49923	49923	49927	49926	49858	49969	49780	49919	49955	49949	49898	49893	49915	49908	49876	49708	49102	53114	43217	45778	45784	45787	45822	45844	45813	45821	45787	45789	39851	39820	39658
16	I	E. xiangfangensis	90	2017	Lubeck	blood	90	RBL-17-0437-1	48286	47419	47775	47887	49960	49955	49994	49989	49896	50001	49975	49975	49979	49973	49928	50025	49834	49977	50013	50009	49935	49938	49972	49965	49927	49771	49155	53150	43312	45859	45880	45857	45891	45929	45902	45887	45867	45869	40042	39983	39824
16	I	E. xiangfangensis	90	2017	Freiburg	rectal swab	90	RPF-17-0249-1	48290	47422	47778	47890	49960	49955	49994	49989	49896	50001	49975	49975	49979	49973	49928	50025	49834	49977	50013	50009	49935	49938	49972	49965	49927	49771	49155	53151	43313	45862	45883	45860	45894	45932	45905	45890	45870	45872	40043	39984	39825
		E. xiangfangensis	1264	2018	Berlin	rectal swab	1264	RPB-18-0140-1	48260	47391	47759	47837	49986	49974	50010	50003	49916	50010	50005	50005	50009	50003	49952	50057	49866	50003	50027	50010	49965	49958	49994	49987	49948	49788	49181	53193	43228	45822	45853	45838	45860	45903	45866	45855	45852	45854	40014	39963	39819
17	I	E. xiangfangensis	65	2017	Freiburg	rectal swab	65	RPF-17-0260-1	48327	47468	47831	47922	49987	49976	50017	50011	49931	50002	49990	49990	49994	50012	49954	50054	49870	49999	50040	50036	49983	49966	49999	49992	49956	49798	49188	53146	43280	45897	45934	45913	45944	45971	45939	45947	45908	45910	40030	39972	39829
17	I	E. xiangfangensis	65	2017	Cologne	blood	65	RBK-17-0221-2	48335	47475	47838	47929	49993	49982	50023	50017	49937	50008	49996	49996	50000	50018	49960	50060	49876	50005	50046	50042	49989	49972	50005	49998	49962	49804	49194	53153	43287	45905	45942	45921	45952	45979	45947	45955	45916	45918	40038	39978	39837
17	I	E. xiangfangensis	1300	2016	Tubingen	rectal swab	1300	RPT-16-0054-1	48335	47475	47838	47929	49994	49983	50023	50017	49936	50009	49997	49997	50001	50019	49961	50061	49877	50006	50045	50043	49988	49973	50006	49999	49963	49805	49195	53149	43290	45906	45943	45922	45953	45980	45948	45956	45917	45919	40039	39979	39836
		E. xiangfangensis	175	2018	Giessen	blood	175	RBG-18-0107-1	48223	47367	47744	47825	49929	49939	49975	49953	49879	49959	49950	49950	49954	49945	49905	50008	49828	49962	49973	49979	49921	49930	49949	49942	49901	49738	49121	53184	43219	45777	45792	45797	45811	45843	45809	45828	45798	45800	39933	39918	39748
18	I	E. xiangfangensis	175	2012	Berlin	PEG (percutaneous endoscopic gastrostomy)	175	ESBL3620	48253	47392	47769	47850	49955	49965	50003	49979	49905	49985	49973	49973	49977	49969	49931	50031	49854	49986	49995	50005	49947	49953	49974	49967	49929	49764	49147	53206	43248	45804	45819	45826	45838	45870	45835	45855	45825	45827	39965	39948	39780
18	I	E. xiangfangensis	175	2017	Giessen	blood	175	RBG-17-0345-1	48263	47404	47781	47862	49968	49979	50014	49992	49917	49998	49986	49986	49990	49982	49945	50044	49867	49999	50008	50016	49959	49967	49986	49979	49941	49775	49158	53214	43259	45814	45829	45836	45848	45880	45846	45865	45835	45837	39973	39958	39788
18	I	E. xiangfangensis	175	2017	Cologne	blood	175	RBK-17-0014-2	48252	47393	47770	47851	49955	49965	50001	49979	49905	49985	49973	49973	49977	49969	49931	50031	49854	49986	49995	50003	49947	49953	49972	49965	49927	49762	49145	53203	43248	45803	45818	45825	45837	45869	45835	45854	45824	45826	39962	39947	39777
		E. xiangfangensis	1268	2014	Cologne	blood	1268	F-232	48162	47339	47718	47796	49888	49876	49924	49915	49822	49931	49903	49903	49907	49903	49859	49972	49782	49911	49930	49936	49869	49863	49889	49882	49875	49692	49084	53079	43244	45791	45795	45797	45832	45849	45815	45835	45804	45806	39896	39878	39686
		E. xiangfangensis	1296	2017	Lubeck	blood	1296	RBL-17-0384-1	48240	47396	47747	47841	49927	49923	49963	49936	49874	49962	49936	49936	49940	49942	49882	49956	49800	49952	49960	49966	49894	49907	49933	49928	49885	49705	49093	53198	43261	45819	45833	45842	45868	45893	45871	45869	45839	45842	39990	39945	39804
19	I	E. xiangfangensis	45	2015	Cologne	blood	45	F03651	48283	47415	47799	47866	49889	49879	49916	49894	49817	49914	49869	49869	49873	49898	49834	49939	49758	49904	49922	49940	49867	49868	49891	49884	49844	49677	49058	52974	43218	45828	45830	45824	45842	45876	45862	45858	45830	45832	39929	39886	39729
19	I	E. xiangfangensis	45	2016	Freiburg	blood	45	RBF-16-0075-1	48293	47424	47808	47875	49898	49888	49925	49903	49826	49923	49878	49878	49882	49907	49843	49948	49767	49913	49931	49949	49876	49877	49900	49893	49853	49686	49067	52985	43225	45837	45839	45833	45851	45885	45871	45867	45839	45841	39938	39895	39738
		E. xiangfangensis	1297	2018	Lubeck	blood	1297	RBL-18-0073-1	48224	47402	47777	47852	49884	49881	49940	49924	49824	49925	49925	49925	49929	49893	49849	49957	49782	49912	49956	49941	49878	49885	49899	49892	49857	49689	49063	53092	43080	45760	45787	45776	45813	45836	45806	45807	45763	45765	39982	39905	39753
		E. xiangfangensis	1293	2017	Cologne	rectal swab	1293	RPK-17-0437-2	48219	47366	47741	47839	49851	49864	49888	49871	49791	49889	49864	49864	49868	49839	49816	49931	49747	49878	49908	49913	49831	49845	49843	49838	49804	49661	49033	53104	43185	45772	45791	45775	45806	45823	45801	45822	45777	45779	39932	39891	39744
		E. xiangfangensis	170	2011	Tubingen	blood	170	BK4615	48199	47384	47778	47850	49922	49929	49964	49954	49875	49973	49952	49952	49956	49946	49877	49993	49806	49951	49976	49969	49915	49918	49936	49929	49873	49713	49095	53165	43171	45781	45802	45797	45834	45849	45812	45833	45797	45799	39966	39894	39726
		E. xiangfangensis	636	2015	Cologne	blood	636	F-190	48279	47384	47785	47864	49931	49932	49968	49946	49875	49969	49941	49941	49945	49943	49883	50010	49813	49963	49992	49978	49927	49914	49955	49948	49890	49736	49117	53159	43203	45775	45798	45781	45815	45849	45800	45824	45780	45782	39921	39905	39724
		E. xiangfangensis	1115	2017	Berlin	rectal swab	1115	RPB-17-0209-1	48310	47439	47815	47919	49963	49966	49997	49995	49914	49998	49984	49984	49988	49973	49924	50037	49868	49996	50024	50014	49964	49953	49987	49980	49944	49784	49155	53149	43234	45801	45807	45809	45839	45861	45819	45853	45814	45816	39942	39886	39743
		E. xiangfangensis	1202	2014	Berlin	rectal swab	1202	ESBL5467	48201	47294	47676	47781	49938	49942	49957	49941	49876	49953	49965	49965	49969	49957	49904	49997	49819	49959	49970	49985	49908	49925	49945	49938	49901	49723	49093	53137	43196	45749	45772	45766	45794	45825	45790	45802	45771	45774	39944	39907	39774
		E. xiangfangensis	204	2018	Freiburg	blood	204	RBF-18-0058-1	48191	47348	47730	47825	49843	49863	49908	49877	49806	49900	49880	49880	49884	49890	49828	49943	49729	49885	49901	49916	49841	49857	49870	49863	49826	49672	49051	53036	43156	45739	45776	45762	45787	45804	45784	45805	45764	45766	39964	39912	39765
		E. xiangfangensis	1279	2018	Freiburg	blood	1279	RBF-18-0729-1	48266	47379	47775	47857	49895	49900	49939	49928	49850	49934	49920	49920	49924	49901	49873	49973	49788	49918	49953	49962	49873	49891	49900	49893	49859	49708	49098	53171	43281	45859	45864	45859	45911	45915	45887	45908	45864	45866	40038	39982	39843
		E. xiangfangensis	517	2017	Berlin	rectal swab	517	RPB-17-0198-1	48286	47418	47793	47888	49912	49870	49929	49908	49842	49923	49917	49917	49921	49895	49857	49969	49786	49910	49952	49953	49875	49879	49892	49885	49866	49707	49085	53201	43252	45910	45946	45932	45965	45989	45956	45972	45942	45944	40008	39958	39827
20	I	E. xiangfangensis	539	2018	Giessen	blood	539	RBG-18-0320-1	48226	47398	47744	47828	50001	50001	50036	50021	49927	50012	50022	50022	50026	50009	49975	50066	49881	50002	50051	50049	50001	49990	50028	50021	49966	49808	49197	53202	43314	45876	45872	45860	45889	45929	45897	45898	45882	45884	39981	39910	39747
20	I	E. xiangfangensis	539	2017	Cologne	blood	539	RBK-17-0375-1	48228	47400	47746	47830	50001	50003	50038	50023	49929	50014	50024	50024	50028	50011	49977	50068	49883	50004	50053	50051	50003	49992	50030	50023	49968	49810	49199	53202	43316	45876	45872	45860	45889	45929	45897	45898	45882	45884	39981	39910	39747
		E. xiangfangensis	116	2018	Freiburg	blood	116	RBF-18-0288-1	48118	47281	47637	47727	49860	49841	49897	49879	49777	49872	49857	49857	49861	49859	49809	49914	49736	49860	49879	49904	49830	49838	49847	49840	49813	49648	49039	53057	43193	45738	45744	45749	45771	45813	45774	45778	45742	45744	39926	39878	39720
		E. xiangfangensis	116	2018	Freiburg	rectal swab	116	RPF-18-0225-1	48087	47257	47612	47706	49845	49821	49878	49861	49767	49857	49840	49840	49844	49840	49797	49899	49718	49849	49868	49892	49816	49822	49835	49828	49800	49634	49025	53047	43185	45722	45724	45732	45757	45795	45755	45762	45722	45724	39908	39856	39702
		E. xiangfangensis	1198	2018	Berlin	blood	1198	RBB-18-0493-1	48244	47412	47767	47870	49974	49967	50006	50015	49917	50021	49990	49990	49994	49995	49944	50042	49867	49987	50017	50018	49960	49974	49982	49975	49940	49770	49150	53146	43265	45838	45844	45831	45867	45894	45872	45877	45843	45846	39968	39936	39771
		E. xiangfangensis	972	2018	Cologne	blood	972	RBK-18-0264-1	48270	47399	47794	47880	49877	49888	49924	49930	49845	49932	49900	49900	49904	49909	49850	49949	49761	49917	49935	49932	49873	49885	49907	49900	49853	49705	49078	52969	43270	45823	45837	45814	45846	45877	45853	45857	45829	45831	40015	40008	39838
[truncated: 126 more columns]
